# Supplementary material for: Late effects in patients with mantle cell lymphoma treated with or without autologous stem cell transplantation
Source: PubMed Central journal article supplement — Blood Adv. 2022 Aug 19;7(5):866–74. doi: 10.1182/bloodadvances.2022007241 (PMC10018432; doi:10.1182/bloodadvances.2022007241), 2022-08-19

# Supplemental materials

**sTable 1.** International Classification of Diseases 10th Revision (ICD-10) and associated codes.

| <b>ICD-10 chapter</b>                                                                   | <b>ICD-10 codes</b>     | <b>Abbreviation</b>   |
|-----------------------------------------------------------------------------------------|-------------------------|-----------------------|
| Neoplasms                                                                               | C00 - D48               | Neoplasms             |
| Diseases of the circulatory system                                                      | I00 - I99               | Circulatory disorders |
| Infectious diseases                                                                     | A00 - B99               | Infections            |
| Mental and behavioural disorders                                                        | F00 - F99               | Mental                |
| Diseases of the respiratory system                                                      | J00 - J99               | Respiratory           |
| Diseases of the genitourinary system                                                    | N00 - N99               | Genitourinary         |
| Symptoms, signs and abnormal clinical and laboratory findings, not elsewhere classified | R00 - R99               | Symptoms              |
| Injury, poisoning and certain other consequences of external causes                     | S00 - T98               | Injuries              |
| Diseases of the blood and blood-forming organs                                          | D50 - D89               | Blood                 |
| Endocrine, nutritional and metabolic diseases                                           | E00 - E90               | Endocrine             |
| Diseases of the nervous system                                                          | G00 - G99               | Nervous               |
| Diseases of the eye and adnexa or diseases of the ear and mastoid process               | H00 - H59 and H60 - H95 | CNS                   |
| Diseases of the digestive system                                                        | K00 - K93               | Digestive             |
| Diseases of the skin and subcutaneous tissue                                            | L00 - L99               | Skin                  |
| Diseases of the musculoskeletal system                                                  | M00 - M99               | Musculoskeletal       |

**Figure 1.** Number of bed days during high-dose chemotherapy with autologous stem cell transplantation (HD-ASCT) treatment among patients selected for HD-ASCT within 12 months from diagnosis (n= 247). Early discharge from inpatient clinic to specialist outpatient care will result in lower number of bed days for some patients.

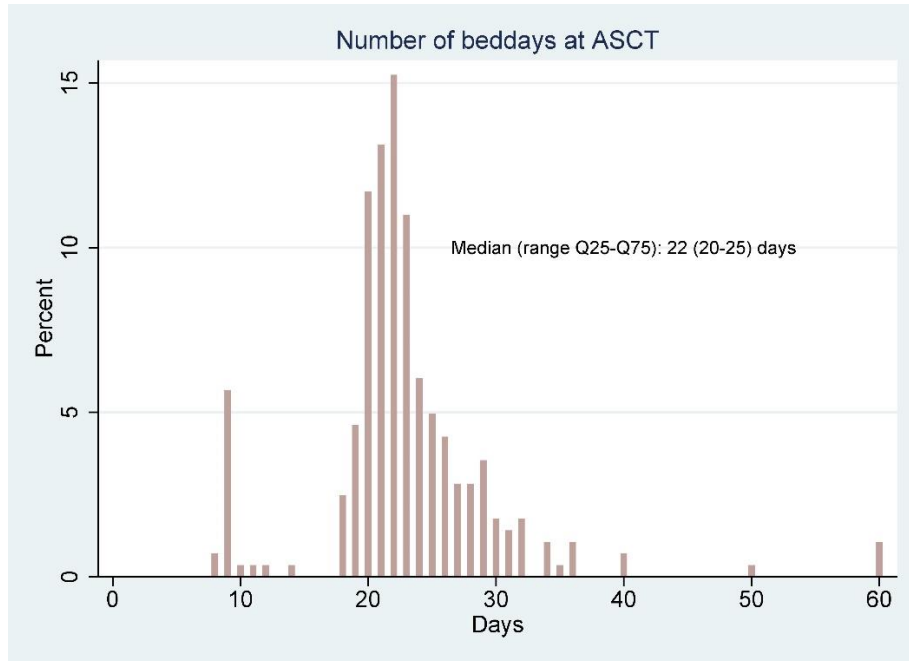

**sTable 2.** Incidence rate ratios (IRRs) with 95% confidence intervals (CIs) of outpatient specialist visits (excluding routine follow-up visits for the mantle cell lymphoma), hospitalizations, and bed days from one year after diagnosis.

|                                      | Outpatient specialist visit<br>IRR (95 % CI) <sup>1</sup> | Hospitalization<br>IRR (95 % CI) | Bed days<br>IRR (95 % CI) |
|--------------------------------------|-----------------------------------------------------------|----------------------------------|---------------------------|
| <b>Blood</b>                         |                                                           |                                  |                           |
| MCL vs comparators                   | 5.61 (3.07,10.23)                                         | 24.58 (13.40,45.11)              | 115.04 (27.07,488.86)     |
| HD-ASCT <sup>2</sup> vs. non-HD-ASCT | 0.96 (0.31, 2.98)                                         | 0.60 (0.21, 1.72)                | 3.26 (0.26,40.78)         |
| <b>Infection</b>                     |                                                           |                                  |                           |
| MCL vs comparators                   | 4.79 (3.36, 6.82)                                         | 8.20 (5.88,11.44)                | 8.89 (4.46,17.75)         |
| HD-ASCT <sup>2</sup> vs. non-HD-ASCT | 1.02 (0.52, 1.98)                                         | 1.22 (0.66, 2.23)                | 1.47 (0.40, 5.43)         |
| <b>Respiratory</b>                   |                                                           |                                  |                           |
| MCL vs comparators                   | 3.60 (2.61, 4.95)                                         | 5.96 (4.29, 8.28)                | 6.12 (3.53,10.60)         |
| HD-ASCT <sup>2</sup> vs. non-HD-ASCT | 1.33 (0.72, 2.44)                                         | 1.25 (0.67, 2.32)                | 0.93 (0.32, 2.70)         |
| <b>Digestive</b>                     |                                                           |                                  |                           |
| MCL vs comparators                   | 1.72 (1.36, 2.17)                                         | 1.34 (0.96, 1.87)                | 1.07 (0.63, 1.80)         |
| HD-ASCT <sup>2</sup> vs. non-HD-ASCT | 0.78 (0.50, 1.22)                                         | 0.92 (0.48, 1.78)                | 0.85 (0.30, 2.39)         |
| <b>Neoplasm</b>                      |                                                           |                                  |                           |
| MCL vs comparators                   | 1.48 (1.05, 2.10)                                         | 1.36 (0.87, 2.12)                | 1.40 (0.71, 2.76)         |
| HD-ASCT <sup>2</sup> vs. non-HD-ASCT | 0.59 (0.30, 1.16)                                         | 0.49 (0.20, 1.21)                | 0.94 (0.26, 3.39)         |
| <b>Skin</b>                          |                                                           |                                  |                           |
| MCL vs comparators                   | 1.70 (1.30, 2.21)                                         | 2.62 (1.03, 6.70)                | 1.75 (0.26,11.66)         |
| HD-ASCT <sup>2</sup> vs. non-HD-ASCT | 1.51 (0.91, 2.50)                                         | 0.83 (0.13, 5.23)                | ...                       |
| <b>Symptoms</b>                      |                                                           |                                  |                           |
| MCL vs comparators                   | 1.99 (1.71, 2.31)                                         | 4.30 (3.39, 5.47)                | 6.65 (4.53, 9.77)         |
| HD-ASCT <sup>2</sup> vs. non-HD-ASCT | 0.94 (0.71, 1.25)                                         | 0.79 (0.50, 1.24)                | 0.72 (0.35, 1.48)         |
| <b>Endocrine</b>                     |                                                           |                                  |                           |
| MCL vs comparators                   | 1.58 (0.97, 2.55)                                         | 1.17 (0.54, 2.55)                | 1.37 (0.46, 4.14)         |
| HD-ASCT <sup>2</sup> vs. non-HD-ASCT | 1.34 (0.52, 3.42)                                         | 0.77 (0.15, 3.86)                | 1.51 (0.17,13.65)         |
| <b>CNS</b>                           |                                                           |                                  |                           |
| MCL vs comparators                   | 1.35 (1.11, 1.64)                                         | 1.64 (0.83, 3.23)                | 1.78 (0.57, 5.54)         |
| HD-ASCT <sup>2</sup> vs. non-HD-ASCT | 1.17 (0.80, 1.70)                                         | 0.62 (0.16, 2.45)                | 1.32 (0.14,12.50)         |
| <b>Genitourinary</b>                 |                                                           |                                  |                           |
| MCL vs comparators                   | 1.27 (0.98, 1.65)                                         | 1.72 (1.18, 2.52)                | 1.88 (1.05, 3.36)         |
| HD-ASCT <sup>2</sup> vs. non-HD-ASCT | 0.75 (0.45, 1.24)                                         | 0.63 (0.29, 1.38)                | 0.53 (0.17, 1.68)         |
| <b>Nervous</b>                       |                                                           |                                  |                           |
| MCL vs comparators                   | 1.08 (0.73, 1.59)                                         | 1.44 (0.87, 2.41)                | 4.37 (1.72,11.15)         |
| HD-ASCT <sup>2</sup> vs. non-HD-ASCT | 1.20 (0.56, 2.57)                                         | 0.40 (0.14, 1.19)                | 0.08 (0.01, 0.42)         |
| <b>Injuries</b>                      |                                                           |                                  |                           |
| MCL vs comparators                   | 1.01 (0.80, 1.26)                                         | 1.02 (0.71, 1.45)                | 0.91 (0.52, 1.59)         |
| HD-ASCT <sup>2</sup> vs. non-HD-ASCT | 1.24 (0.80, 1.93)                                         | 0.65 (0.32, 1.33)                | 0.69 (0.23, 2.05)         |
| <b>Musculoskeletal</b>               |                                                           |                                  |                           |
| MCL vs comparators                   | 0.81 (0.65, 1.02)                                         | 0.82 (0.57, 1.17)                | 0.71 (0.42, 1.18)         |
| HD-ASCT <sup>2</sup> vs. non-HD-ASCT | 0.89 (0.57, 1.38)                                         | 0.91 (0.44, 1.88)                | 0.77 (0.28, 2.12)         |
| <b>Circulatory disorders</b>         |                                                           |                                  |                           |
| MCL vs comparators                   | 0.91 (0.71, 1.16)                                         | 0.87 (0.65, 1.17)                | 0.83 (0.57, 1.22)         |
| HD-ASCT <sup>2</sup> vs. non-HD-ASCT | 0.81 (0.50, 1.32)                                         | 1.24 (0.70, 2.21)                | 1.38 (0.66, 2.88)         |
| <b>Mental</b>                        |                                                           |                                  |                           |
| MCL vs comparators                   | 0.79 (0.43, 1.45)                                         | 1.12 (0.50, 2.51)                | 1.49 (0.38, 5.87)         |
| HD-ASCT <sup>2</sup> vs. non-HD-ASCT | 0.42 (0.13, 1.32)                                         | 0.77 (0.17, 3.51)                | 0.08 (0.01, 0.76)         |

Abbreviations: MCL, mantle cell lymphoma; HD-ASCT, high dose chemotherapy with autologous stem cell transplantation.

**sFigure2.** Percentage of mantle cell lymphoma (MCL) patients with at least one diagnosis (outpatient specialist visits or hospitalization) or a cause of death in the disease groups: Respiratory system (ICD10: J00-J99), infectious diseases (A00-B99), diseases of the blood and blood-forming organs (D50-D89), and neoplasms (C00-C80). Neoplasms also show absolute number of patients.

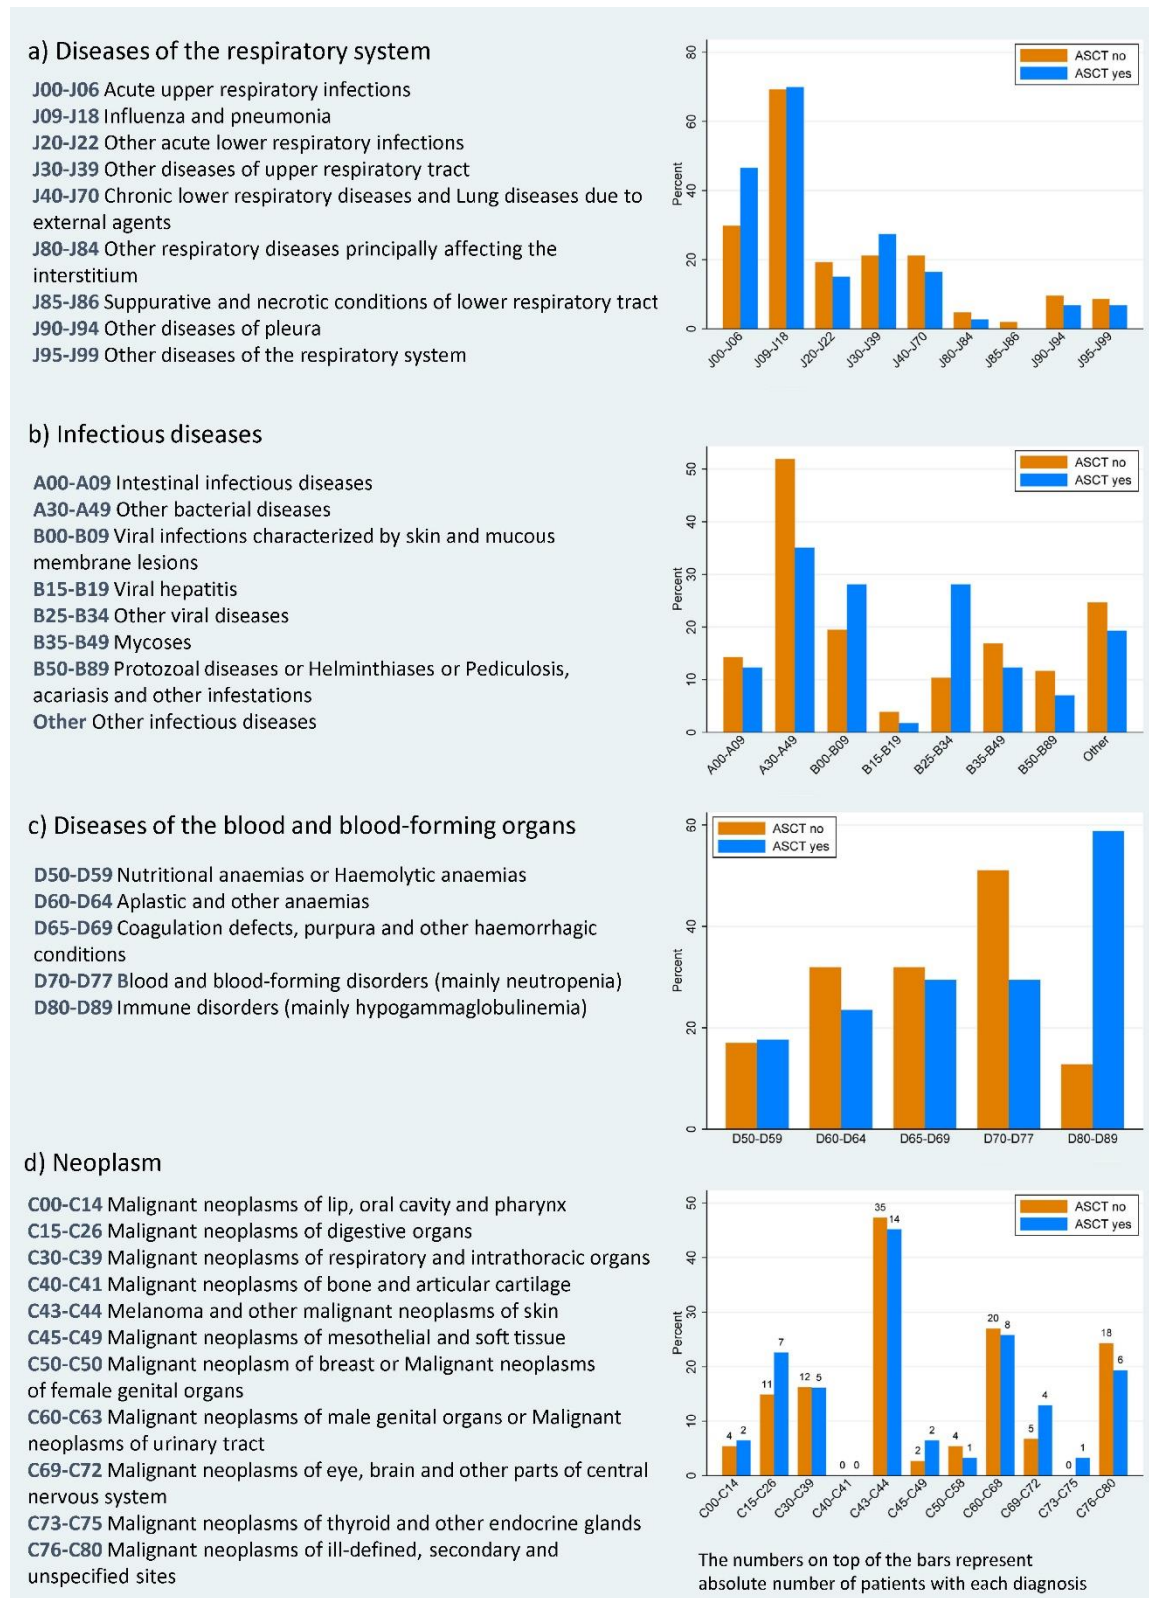

**sFigure 3.** Mean number of outpatient specialist visits, hospitalizations, and bed days among MCL patients (by HD-ASCT/non-HD ASCT) and comparators by time windows starting from one year after diagnosis.

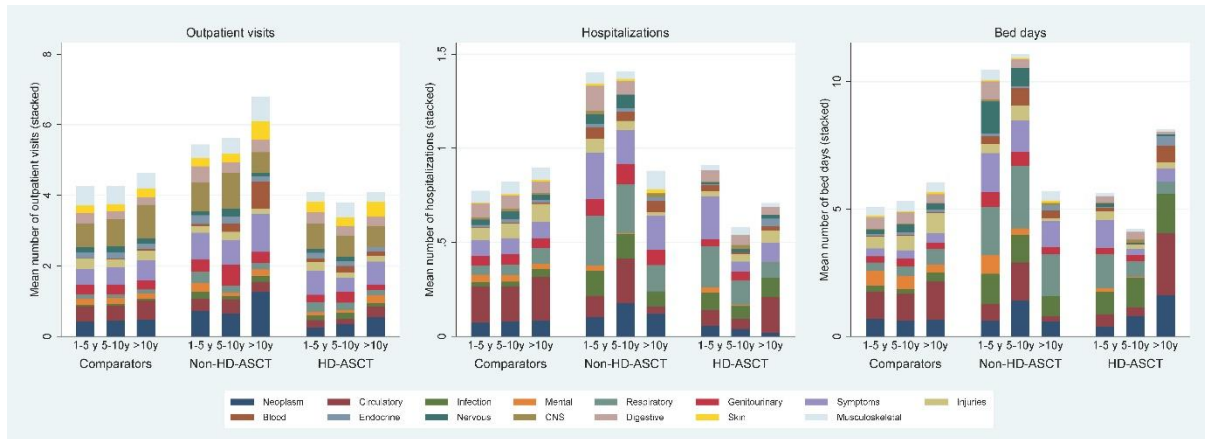

*Abbreviations: MCL, mantle cell lymphoma; HD-ASCT, high dose chemotherapy with autologous stem cell transplantation.*

**sFigure 4.** Crude cumulative probabilities of death due to hematological malignancies, other malignancies, cardiovascular disease (CVD), and other causes among matched comparators. Note that these results cannot be generalized to the general population as a whole as the comparators are selected to match the distribution of age and sex among the patients.

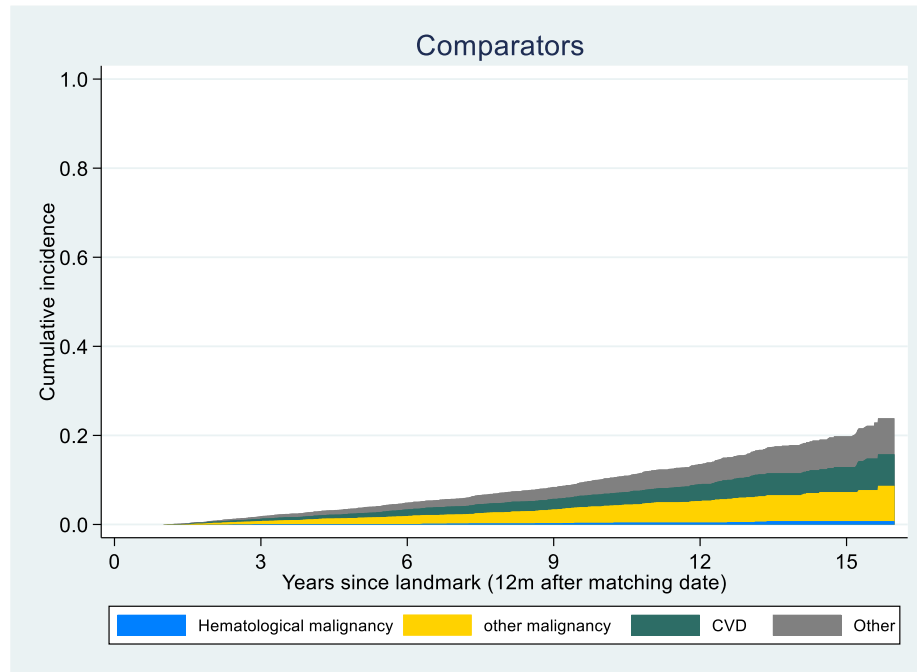

Supplement: BLOODA_ADV-2022-007241-mmc1.pdf [file BLOODA_ADV-2022-007241-mmc1.pdf]
